# Supplementary material
Source: PubMed Central journal article supplement (PMC5349394)
Supplement: Appendix.pdf [file Appendix.pdf]

Table 1. Survey Questions

| Question                                                                                                                                                                                                                                                                                          | Possible answers                                                                                                                                                                                                                                          |
|---------------------------------------------------------------------------------------------------------------------------------------------------------------------------------------------------------------------------------------------------------------------------------------------------|-----------------------------------------------------------------------------------------------------------------------------------------------------------------------------------------------------------------------------------------------------------|
| 1. Does your school have a certified athletic trainer (ATC) that provides care for athletic injuries and illnesses?                                                                                                                                                                               | Yes<br>No                                                                                                                                                                                                                                                 |
| 2. Do any of the following provide care for <u>athletic injuries and illnesses</u> ? (Mark all that apply.)                                                                                                                                                                                       | A coach<br>A school nurse<br>An emergency responder, e.g. paramedic, emergency medical technician<br>A physical therapist<br>A school administrator<br>Other (please describe)<br>No – none of the above provide care for athletic injuries and illnesses |
| 3. Does your school require coaches to obtain any additional education on athlete healthcare beyond the training mandated by OSAA? (OSAA requires completion of the following: concussion management, heat acclimatization & heat illness prevention, and spirit safety clinic.)                  | Yes<br>No                                                                                                                                                                                                                                                 |
| <i>If yes &gt; What additional training is required? (Mark all that apply)</i>                                                                                                                                                                                                                    | CPR<br>AED<br>First Aid<br>Other (Please Specify)                                                                                                                                                                                                         |
| 4. Does your school have an AED (automated external defibrillator) that can be obtained and ready to use on a patient in less than four minutes from the time of collapse?                                                                                                                        | Yes for all athletic venues<br>Yes for some athletic venues, but no for others<br>No                                                                                                                                                                      |
| 5. Does your school have <u>athletic venue specific emergency action plans for athletic emergency medical situations</u> ? (That is, are there separate emergency action plans for every athletic venue such as the main gymnasium, football stadium, weight room, athletic training room, etc.?) | Yes<br>No                                                                                                                                                                                                                                                 |

---

Abbreviations: OSAA: Oregon School Activities Association

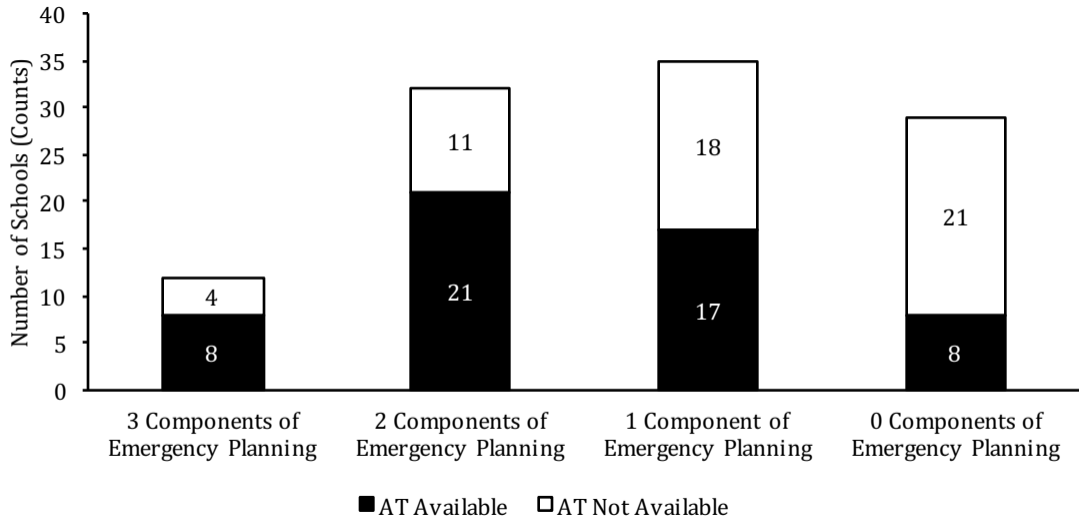

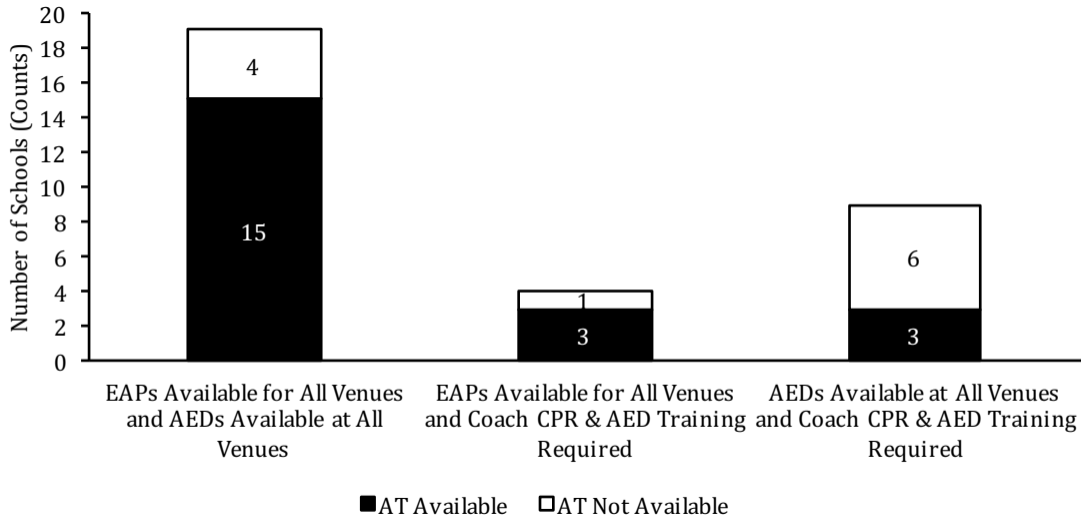

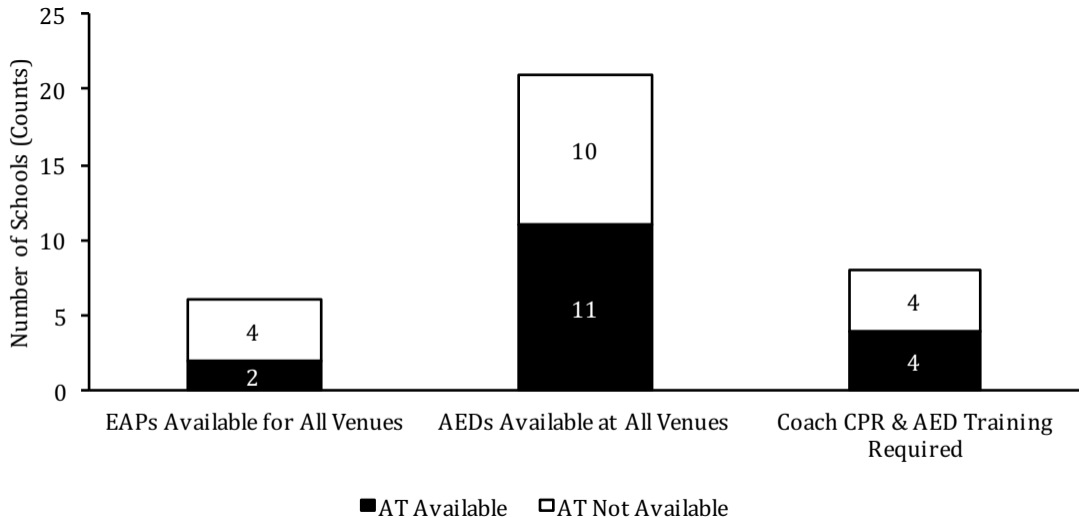

Figure 1: a) There was a significant association between AT availability and adoption of sports-related emergency best practice recommendations (chi-square=10.3, p=0.016) with a trend that the proportion of schools with ATs increased with the number of recommendations adopted (chi-square=9.3, p=0.002). Total schools n=108 (AT available n=54, AT not available n=54). b) Breakdown of which recommendations schools that had adopted *two* of the recommendations had implemented ( $n = 32$ ). c) Breakdown of which recommendation schools that had adopted *one* recommendation had implemented ( $n = 35$ ).

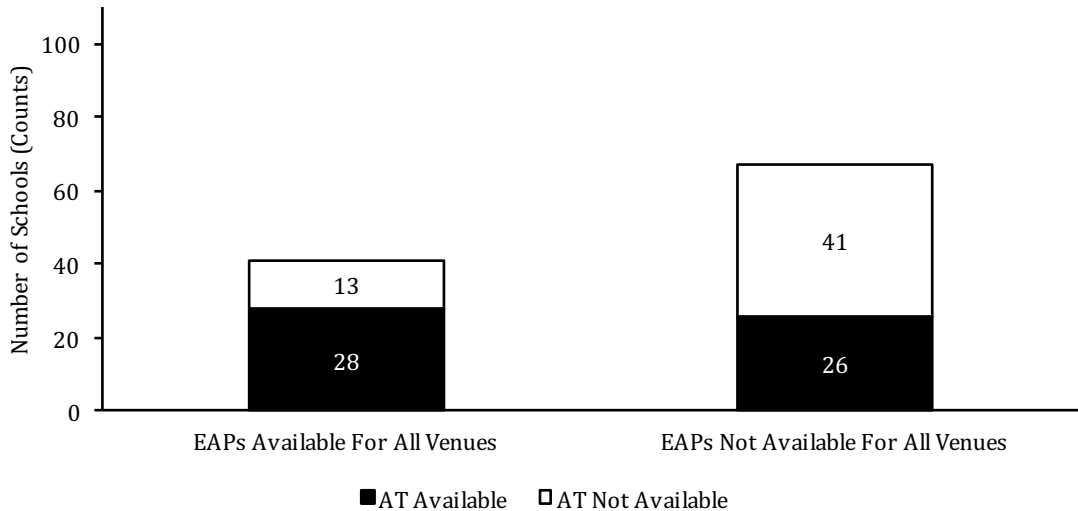

Figure 2: Schools with an AT were more likely to implement venue specific EAPs than school without an AT (52% vs. 24%,  $p=0.005$ ).

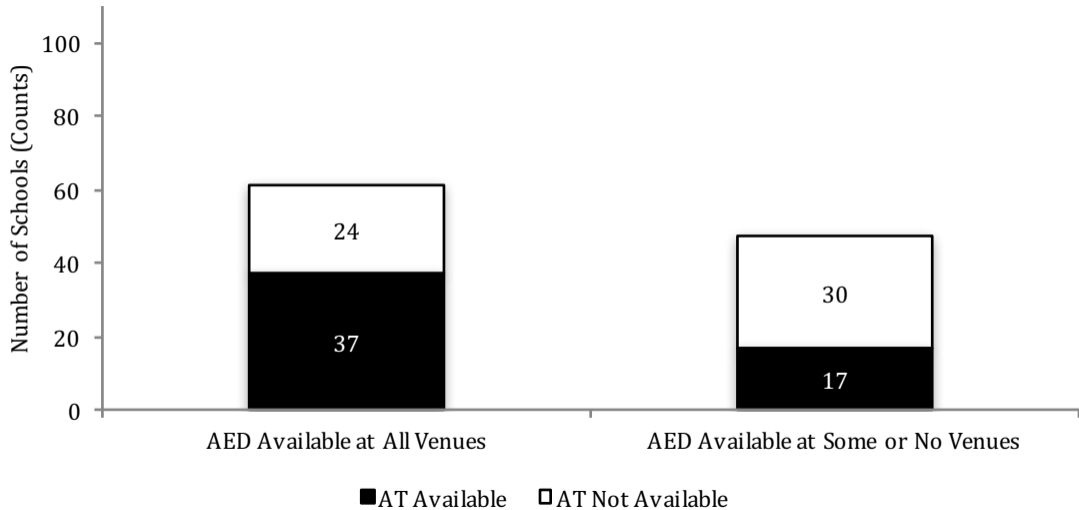



Figure 3: Schools with an AT were more likely to have AEDs available at *all* venues for early defibrillation than schools without an AT(69% vs. 44%,  $p=0.019$ ). Schools that reported having AEDs available for early defibrillation at some venues or not having an AED available on campus were collapsed for statistical analysis. In total 6% of schools ( $n= 7$ ) – all in schools without an AT - reported not having an AED on campus.

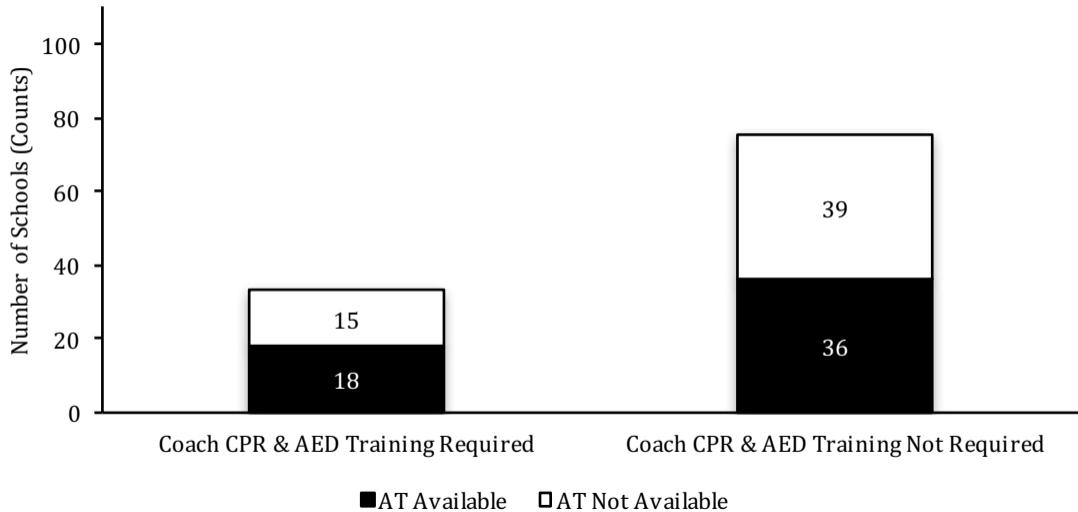

Figure 4: There was no association between schools with and without the services of an AT and whether coaches were required to be trained in CPR and AED use (33% vs. 28%,  $p=0.677$ ).
